# Supplementary material for: Gut microbiome dysregulation drives bone damage in broiler tibial dyschondroplasia by disrupting glucose homeostasis
Source: PubMed Central journal article supplement (PMC9810666; doi:10.1038/s41522-022-00360-6), 2023-01-03

**Gut microbiome dysregulation drives bone damage in broiler tibial  
dyschondroplasia by disrupting glucose homeostasis**

**Results of Western blotting in the duodenum:**

**Claudin 1 21KDa**

**Day7                      Day21**  
**Group: CON TD      CON TD TFRD**

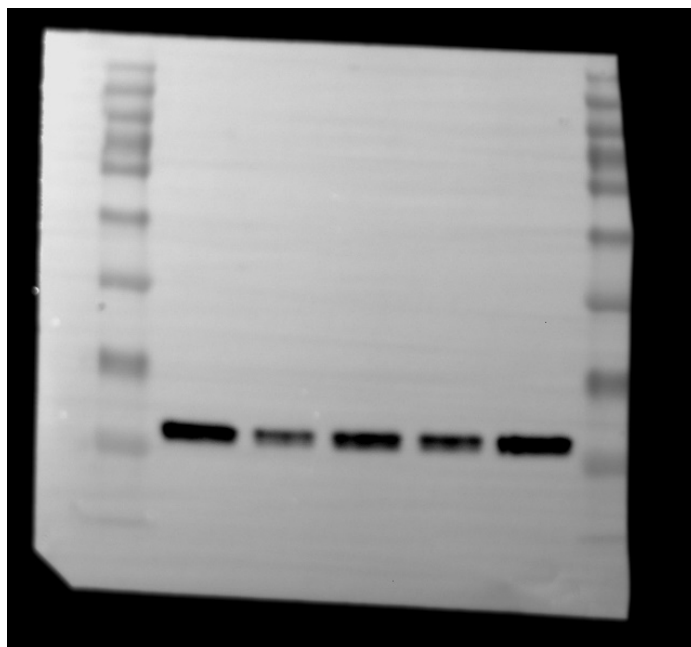

**Occludin 60KDa**

**Day 7                      Day 21**  
**Group: CON TD      CON TD TFRD**

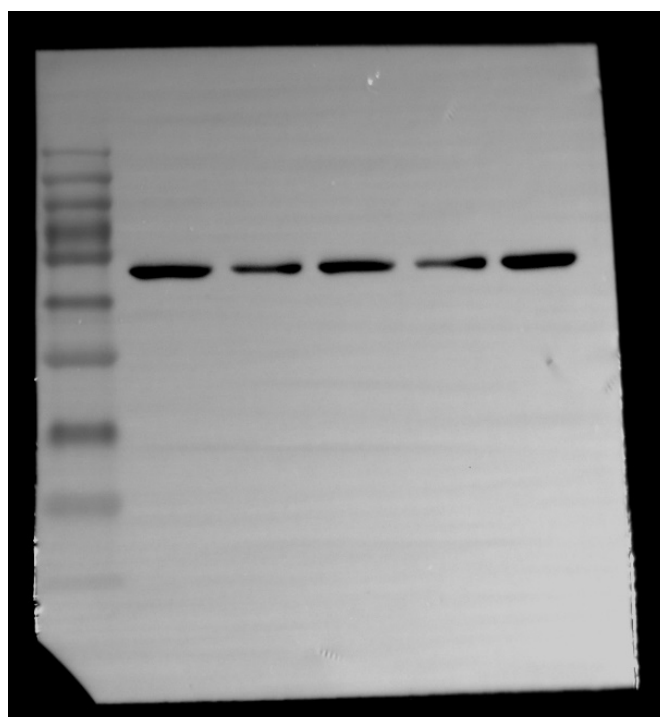

**β-actin 43KDa**

**Day 7**

**Day 21**

**Group: CON TD CON TD TFRD**

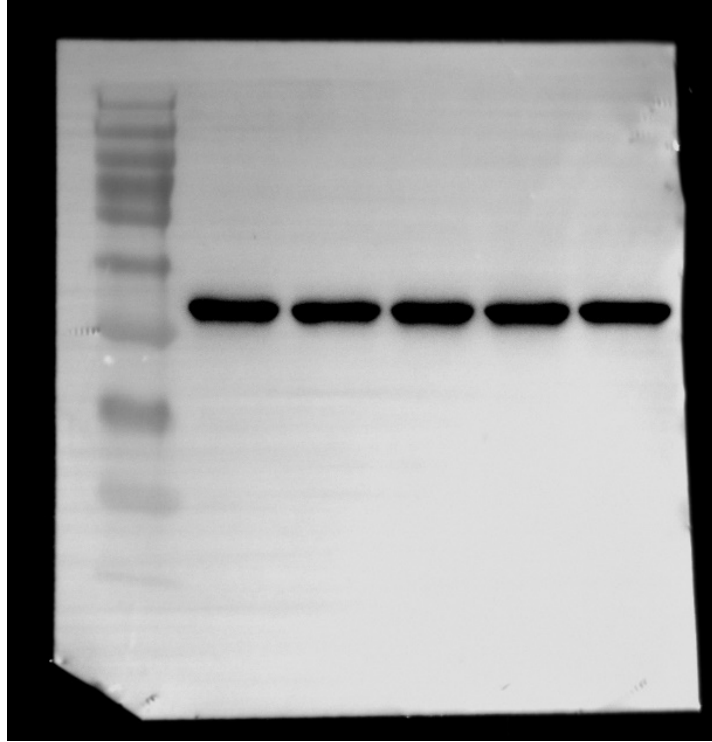

**Results of Western blotting in the tibial growth plate:**

**PI3K 95KDa**  
**Day 7 Day 21**  
**Group: CON TD CON TD TFRD**

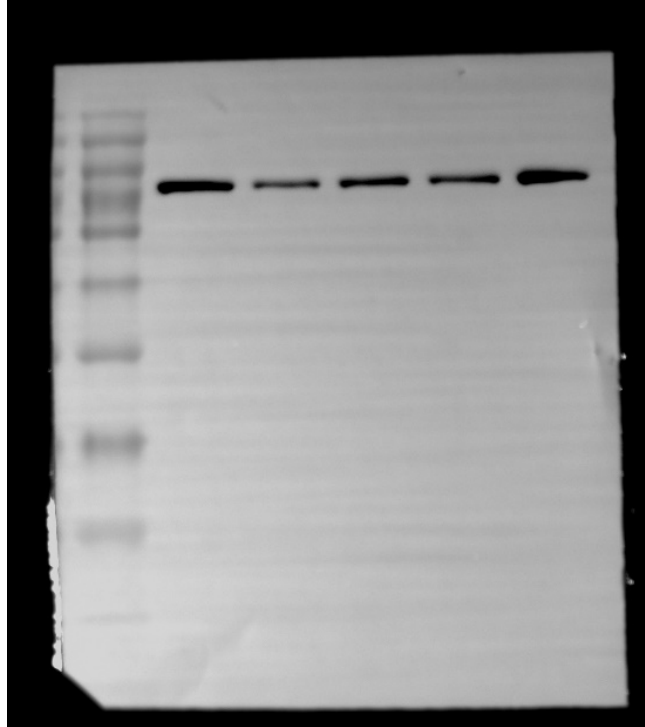

**AKT 60KDa**  
**Day 7 Day 21**  
**Group: CON TD CON TD TFRD**

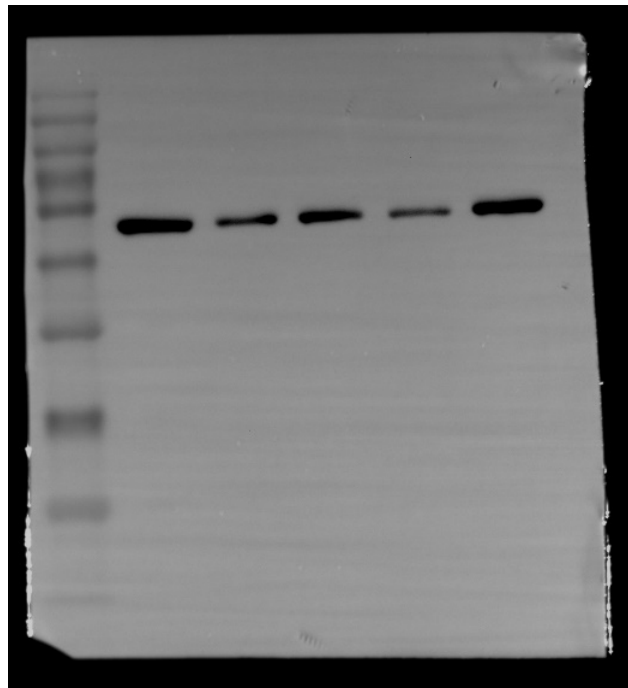

**VEGFA 43KDa**

Day 7                      Day 21  
Group: CON TD        CON TD TFRD

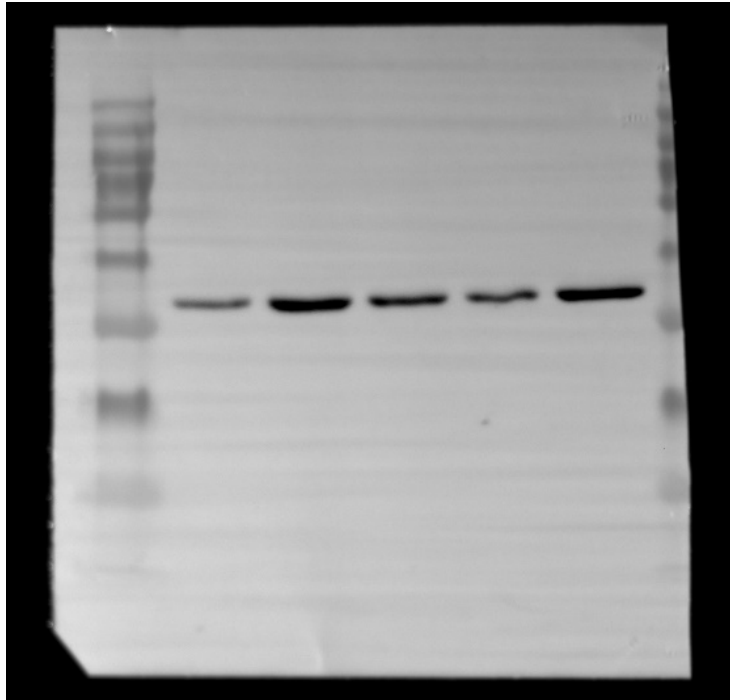

**$\beta$ -actin 43KDa**

Day 7                      Day 21  
Group: CON TD        CON TD TFRD

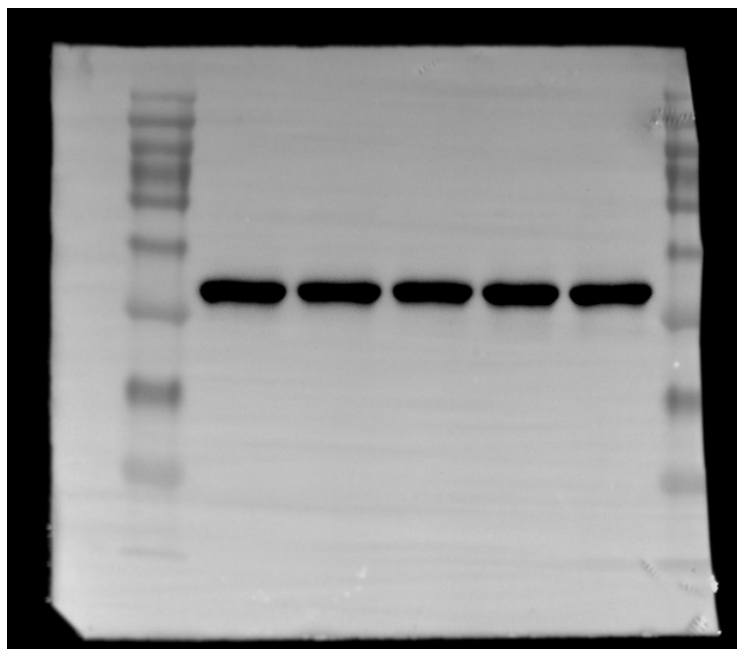

Supplement: 41522_2022_360_MOESM2_ESM.pdf [file 41522_2022_360_MOESM2_ESM.pdf]
